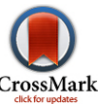

# Food Insecurity with Hunger Is Associated with Obesity among HIV-Infected and at Risk Women in Bronx, NY

Nicole Sirotin<sup>1\*</sup>, Donald R. Hoover<sup>2</sup>, Qihu Shi<sup>3</sup>, Kathryn Anastos<sup>4</sup>, Sheri D. Weiser<sup>5</sup>

**1** Department of Medicine, Weill Cornell Medical College, New York, New York, United States of America, **2** Department of Statistics and Biostatistics, Institute for Health, Health Care Policy and Aging Research, Rutgers University, New Brunswick, New Jersey, United States of America, **3** Department of Epidemiology and Community Health, New York Medical College, Valhalla, New York, United States of America, **4** Departments of Medicine and Epidemiology and Population Health, Montefiore Medical Center and Albert Einstein College of Medicine, Bronx, New York, United States of America, **5** Division of HIV/AIDS, San Francisco General Hospital, University of California, San Francisco (UCSF), San Francisco, California, United States of America

## Abstract

**Background:** Food insecurity, insufficient quality and quantity of nutritionally adequate food, affects millions of people in the United States (US) yearly, with over 18 million Americans reporting hunger. Food insecurity is associated with obesity in the general population. Due to the increasing prevalence of obesity and risk factors for cardiovascular disease among HIV-infected women, we sought to determine the relationship between food insecurity and obesity in this cohort of urban, HIV-infected and –uninfected but at risk women.

**Methods:** Using a cross-sectional design, we collected data on food insecurity, body mass index and demographic and clinical data from 231 HIV-infected and 119 HIV-negative women enrolled in Bronx site of the Women's Interagency HIV Study (WIHS). We used multivariate logistic regression to identify factors associated with obesity.

**Results:** Food insecurity was highly prevalent, with almost one third of women (110/350, 31%) reporting food insecurity over the previous six months and over 13% of women reported food insecurity with hunger. Over half the women were obese with a Body Mass Index (BMI) of  $\geq 30$ . In multivariate analyses, women who were food insecure with hunger had higher odds of obesity (Adjusted odds ratio [aOR] = 2.56, 95% Confidence Interval [CI] = 1.27, 5.20) after adjusting for HIV status, age, race, household status, income, drug and alcohol use.

**Conclusion:** Food insecurity with hunger was associated with obesity in this population of HIV-infected and –uninfected, urban women. Both food insecurity and obesity are independent markers for increased mortality; further research is needed to understand this relationship and their role in adverse health outcomes.

**Citation:** Sirotin N, Hoover DR, Shi Q, Anastos K, Weiser SD (2014) Food Insecurity with Hunger Is Associated with Obesity among HIV-Infected and at Risk Women in Bronx, NY. PLoS ONE 9(8): e105957. doi:10.1371/journal.pone.0105957

**Editor:** Jung Eun Lee, Sookmyung Women's University, Republic of Korea

**Received:** October 28, 2013; **Accepted:** July 31, 2014; **Published:** August 27, 2014

**Copyright:** © 2014 Sirotin et al. This is an open-access article distributed under the terms of the Creative Commons Attribution License, which permits unrestricted use, distribution, and reproduction in any medium, provided the original author and source are credited.

**Funding:** The WIHS is funded by the National Institute of Allergy and Infectious Diseases ([www.niaid.nih.gov](http://www.niaid.nih.gov)) with supplemental funding from the National Cancer Institute ([www.cancer.gov](http://www.cancer.gov)), and the National Institute on Drug Abuse ([www.drugabuse.gov](http://www.drugabuse.gov)) (UO1-AI-35004, UO1-AI-31834, UO1-AI-34994, UO1-AI-34989, UO1-AI-34993, and UO1-AI-42590). The funders had no role in study design, data collection and analysis, decision to publish, or preparation of the manuscript.

**Competing Interests:** The authors have declared that no competing interests exist.

\* Email: [nicolesirotinmd@gmail.com](mailto:nicolesirotinmd@gmail.com)

## Introduction

Food insecurity, defined as uncertain availability of nutritionally adequate, safe food, affected 14.5% of American households in 2012. Almost 6% of American households were in the most severe category of food insecurity called very low food security or food insecurity with hunger [1]. Food insecurity with hunger exists when meals are skipped or decreased in size due to lack of resources to purchase adequate quantity or quality of food [1]. While in the developing world food insecurity is associated with being underweight [2], in developed countries, multiple cross-sectional studies have found a relationship between food insecurity and obesity, particularly among women [3–8].

The relationship between food insecurity and body mass index (BMI) is complex and varies by population and study [6–8]. For those who are often food insecure, during periods of adequate food availability there may be overconsumption of high calorie, energy

dense foods, which can result in metabolic changes, such as insulin resistance, that predispose individuals to obesity [9,10]. In a study in the general population in California, obesity was more prevalent among women who experienced food insecurity with hunger as compared to food secure women (35.2% vs. 16.2%,  $P < 0.05$ ), particularly among minority women. Among black and Hispanic women who were food insecure with hunger, 52.1% and 42.1% respectively were obese, compared to 26.5% of white women [3]. Additionally, among the over 4000 women enrolled in the National Health and Nutrition Examination Survey (NHANES), food insecurity was associated with being overweight and food insecurity with hunger was associated with being obese [11]. Further studies have shown that in low income populations, food insecurity is associated with obesity-related cardiovascular risk factors such as self-reported hypertension (Adjusted Relative Risk (ARR) 1.20, 95% Confidence Interval (CI) [1.04–1.38]) [12], dyslipidemia (ARR 1.30, 95% CI [1.09–1.55]) and a higher odds

of diabetes (Adjusted Odds Ratio (AOR) 2.1, 95% CI [1.1–4.0]) [12,13]. Food insecurity is also associated with a 20% higher odds of inflammation as measured by elevated C Reactive Protein, an inflammatory marker, and through elevated white blood cells [14].

Due to known increases in cardiovascular risk factors, inflammation and immune activation among people with HIV, understanding the potential upstream causes of these risk factors is particularly important. Food insecurity is prevalent among US urban, HIV-infected, marginalized populations, with estimations that up to 50% of some of these HIV-infected populations experience food insecurity [15–17]. Among HIV-infected individuals, food insecurity is an important predictor of poor HIV treatment outcomes, morbidity and increased mortality [18], although the pathways that explain this relationship are still unclear [19]. Obesity, increasingly recognized as causing a high inflammatory state [20], is also an important cause of morbidity and mortality among women with HIV [21,22], particularly among poor, minority women [3,23].

Since obesity may further compound consequences of HIV on inflammation and cardiovascular risk factors, understanding the association between food insecurity and obesity is particularly important among HIV-infected populations. We therefore sought to determine the prevalence of food insecurity, and its relationship with obesity in urban, HIV-infected and at risk women enrolled in the Bronx site of Women's Interagency HIV Study.

## Methods

### Ethics Statement

Each WIHS participant gave written informed consent and the institutional review board at Montefiore Medical Center approved of this study.

### Population

The Women's Interagency HIV Study (WIHS) is a, multicenter cohort designed to study the effect of HIV infection on women [24]. In 1994, HIV-infected and HIV-negative women were recruited by institutional and community organizations and since then have been followed every 6 months. Trained research assistants collected socio-demographic data at study entry including age, income, education level, employment, and behavioral health risk factors. At baseline and each subsequent visit, participants had a focused physical examination, provided blood specimens for CD4 lymphocyte and complete blood counts, and provided information on recent health status, health behaviors, and socioeconomic status.

### Setting

This sub-study is limited to the Bronx WIHS site only. Bronx, NY was recently noted as having among the lowest incomes among urban counties in the country [25]. Almost 50% of all households and 56% of households with children in the South Bronx are recipients of federal Supplemental Nutrition Assistance Program (SNAP, formerly called Food Stamps) suggesting considerable food insecurity, and it is estimated that only 2/3 of people who are eligible actually receive benefits [26]. This sub-study consists of 231 HIV infected and 119 HIV-negative women at Visit 34 between April 2011 and, October 2011.

### Measures

With the exception of demographic variables collected at baseline visits, all variables for this analysis were obtained from visit 34.

The United States Department of Agriculture (USDA) Food Security Survey Module, a validated tool to measure levels of food security for the US population, was administered by research assistants trained with the USDA recommended probes [27]. The USDA Food Security Survey Module differentially assesses food security status level for both households with children and households without children through 18 and 10 questions, respectively. The questions assess both quality and quantity of food eaten and anxiety around not having food for the household (with the exception of deliberately lowering consumption to reduce weight) over the last 6 months. Households of participants were classified as food secure, food insecure without hunger, or food insecure with hunger based on a standardized scoring algorithm as recommended by the USDA [27]. We then collapsed this into food insecure with hunger versus all other categories based on prior studies showing associations between food insecurity with hunger and important clinical outcomes [12–14,18].

We adjusted for relevant demographic variables previously found to be associated with food insecurity [15,18], including age (continuous), participant's income (<\$6000 per year vs. \$6000–\$12,000 per year vs. >\$12,000 per year), self-identified race/ethnicity: Black including both Black Hispanic and Black non-Hispanic; White including both White Hispanic and White non-Hispanic; and Other), housing (stable = own apartment or lived with family vs. not stable), current employment (yes vs. no), marital status (married/long term partner vs. other), having health insurance (yes vs. no) and whether the household included members under age 18. We also controlled for behavioral variables which have been previously associated with food insecurity and obesity [28] including: sexual risk behaviors during the past 6 months (having any unprotected sex acts versus none), drug (any cocaine, heroin and crack usage versus none) and alcohol use (none, low (<3 drinks per week), moderate (3–13 drinks per week), high (>14 drinks per week)).

Obesity, the primary outcome, was measured with Body Mass Index (BMI) calculated as weight divided by height-squared (kg/m<sup>2</sup>). BMI was dichotomized to <30 (not obese), ≥30 (obese) for the analysis.

### Statistical analysis

Statistical analysis was performed using SAS (version 9.2, SAS Institute Inc., Cary, NC, USA). We first compared sociodemographic and clinical variables by food insecurity status. Next, we used univariate and multivariate logistic regression to identify factors associated with obesity. We built multivariate logistic regression models using backward selection; variables with a p-value of ≤0.20 were removed from the model. We performed the Hosmer-Lemeshow goodness of fit test on the final multivariable model.

## Results

Of 350 women enrolled in the study, approximately two thirds of the sample reported incomes of <\$12,000 (222/350) and 61% of participants identified as black and 23% as "Other" when asked their race (Table 1). About two thirds of women were HIV-infected (231/350) while ~40% had children <18 years old in their household. All participants had health insurance. The majority of women were stably housed (89.7%) and reported very little drug use (4.6%); 16.9% reported moderate alcohol use in the prior 6 months. Approximately one third of women reported unprotected sex in the prior 6 months (33.6%) with HIV negative women reporting twice as much unprotected sex as compared to HIV-infected (52.0% vs. 24.2%, p<0.0001).

**Table 1.** Characteristics of population with Food Insecurity with Hunger vs. No Hunger.

| Parameter                           |             | Total       | Food Insecure with Hunger | No Hunger*      | p-value |
|-------------------------------------|-------------|-------------|---------------------------|-----------------|---------|
|                                     |             | N = 350     | N = 47 (13.4%)            | N = 303 (86.6%) |         |
| Age, mean                           |             | 48.9        | 49.1                      | 48.8            | 0.88    |
| Race/Ethnicity                      | White**     | 56 (16.0%)  | 9 (16.1%)                 | 47 (83.9%)      | 0.04    |
|                                     | Black***    | 212 (60.6%) | 21 (9.9%)                 | 191 (90.1%)     | 0.20    |
|                                     | Other       | 82 (23.4%)  | 17 (20.7%)                | 65 (79.3%)      | 0.49    |
| Income <\$12 K/year                 |             | 222 (63.4%) | 27 (12.2%)                | 195 (87.8%)     | 0.60    |
| HIV Status                          | Infected    | 231 (66.0%) | 33 (14.3%)                | 198 (85.7%)     | 0.62    |
|                                     | Uninfected  | 119 (34.0%) | 14 (11.8%)                | 105 (88.2%)     |         |
| BMI                                 | <30         | 168 (48.0%) | 17 (10.1%)                | 151 (89.9%)     | 0.08    |
|                                     | >30         | 182 (52.0%) | 30 (16.5%)                | 152 (83.5%)     |         |
| Marital Status                      | Yes         | 100 (20.6%) | 11 (11.0%)                | 89 (89.0%)      | 0.49    |
|                                     | Other       | 250 (71.4%) | 36 (14.4%)                | 214 (85.6%)     |         |
| Has Household members <18 years old | Yes         | 139 (39.5%) | 24 (17.3%)                | 115 (82.7%)     | 0.11    |
|                                     | No          | 211 (60.3%) | 23 (10.9%)                | 188 (89.1%)     |         |
| Stable Housing                      | Yes         | 314 (89.7%) | 40 (12.7%)                | 274 (87.3%)     | 0.30    |
|                                     | No          | 36 (10.3%)  | 7 (19.4%)                 | 29 (80.6%)      |         |
| Illicit Drug Use                    | Yes         | 16 (4.6%)   | 1 (6.3%)                  | 15 (93.8%)      | 0.71    |
|                                     | No          | 334 (95.4%) | 46 (13.8%)                | 288 (86.2%)     |         |
| Alcohol Use (at least moderate)     | Yes         | 59 (16.7%)  | 8 (13.6%)                 | 51 (86.4%)      | 0.80    |
|                                     | No          | 291 (83.1%) | 39 (13.4%)                | 252 (86.6%)     |         |
| Sex act                             | Unprotected | 117 (33.5%) | 12 (10.26%)               | 105 (89.74%)    | 0.45    |
|                                     | Protected   | 94 (26.9%)  | 15 (15.96%)               | 79 (84.04%)     |         |
|                                     | None        | 138 (39.5%) | 19 (13.77%)               | 119 (86.23%)    |         |

\*Food Secure + Food Insecure without Hunger.

\*\*Including White Hispanic.

\*\*\*Including Black Hispanic.

doi:10.1371/journal.pone.0105957.t001

Food insecurity was highly prevalent being reported by almost one third of women (110/350, 31%) over the last six months. Over 13% of women reported food insecurity with hunger (Table 1). Women who identified their race as “Other” were more likely to be food insecure with hunger, as compared to white and black women (20.7% vs. 16.1% and 9.9%, respectively,  $p = 0.04$ ). Of the obese women, 65/182 (36.0%) were food insecure and 30/182 (16.5%) were food insecure with hunger, as compared to non-obese women, of whom 10.1% were food insecure with hunger ( $p = 0.08$ , (data not shown)). There were no qualitative or statistical differences between women who were food insecure with (Vs. without) hunger in terms of age, marital status, drug and alcohol use and sexual acts. Moreover, there was little difference in food insecurity with hunger by HIV status, (14.3% vs. 11.8%,  $p = 0.62$  for HIV-infected vs. HIV negative, respectively).

Obesity (BMI $\geq$ 30) was prevalent in this population of low income, HIV-infected and -uninfected women. Over half were obese with a BMI $\geq$ 30 (52.0%) (Table 1). In unadjusted analyses, women who had food insecurity with hunger had higher odds of obesity (OR 1.75, 95% CI [0.93, 3.31]) (Table 2). In adjusted analyses, women who were food insecure with hunger had higher odds of obesity (aOR 2.56, 95% CI [1.27, 5.20]) after adjusting for HIV status, age, race, household status, income, drug and alcohol use (Table 2).

Black women as compared to White women had higher odds of being obese (aOR 2.49, 95% CI [1.31, 4.74]) (Table 2). HIV

infected individuals had lower odds of obesity as compared to HIV negative women (OR 0.54, 95% CI [0.33, 0.90]). Older women also had lower odds of obesity (OR 0.84, 95% CI [0.73, 0.98]). Income, household members under age 18, housing status or drug and alcohol use were not qualitatively or statistically associated with obesity. The Hosmer-Lemeshow goodness of fit test on the final model had  $p$  value of 0.54.

## Discussion

Food insecurity with hunger was associated with obesity in this population of HIV infected and HIV-negative urban women.

Obesity has multiple adverse health effects, including increased risk for metabolic syndrome, heart disease, and diabetes, all which also increase with age [29,30] and can be compounded by the inflammatory effects of HIV itself [31–33]. As women with HIV are living longer, they may be disproportionately affected by the combination of food insecurity, obesity and their already increased risk for metabolic syndrome. Our findings are the first that we are aware of to identify the link between food insecurity with hunger and obesity among HIV-infected and at risk women.

The relationship we, and others, observed between food insecurity and obesity may be related to the body's response to a high metabolic (glucose) load in times of plenty as compared to times of inadequate food. Food insecure households often consume high levels of energy dense foods that are nutritionally lacking, including foods high in saturated fats and refined carbohydrates,

**Table 2.** Bivariate and multivariate analysis of factors associated with obesity (BMI ≥ 30 versus < 30).

| Variable                           | BMI < 30 (Baseline) |         | BMI ≥ 30 | P-value | Bivariate |              | Multivariate |                     |
|------------------------------------|---------------------|---------|----------|---------|-----------|--------------|--------------|---------------------|
|                                    | n                   | %       |          |         | OR        | 95% CI       | aOR          | 95% CI              |
| Age, years                         | 49.7                |         | 48.2     | 0.10    | 0.90      | (0.79, 1.02) | 0.84         | (0.73, 0.98)        |
| Race/Ethnicity                     |                     |         |          |         |           |              |              |                     |
|                                    | 35                  | (62.5%) | 21       | (37.5%) |           |              |              |                     |
|                                    | 89                  | (42.0%) | 123      | (58.0%) | 2.30      | (1.26, 4.22) | <b>2.49</b>  | <b>(1.31, 4.74)</b> |
|                                    | 44                  | (53.7%) | 38       | (46.3%) | 1.44      | (0.72, 2.88) | <b>1.39</b>  | <b>(0.67, 2.91)</b> |
|                                    | 17                  | (36.2%) | 30       | (63.8%) | 1.75      | (0.93, 3.31) | <b>2.56</b>  | <b>(1.27, 5.20)</b> |
| <b>Food insecurity with hunger</b> |                     |         |          |         |           |              |              |                     |
|                                    | 53                  | (42.4%) | 72       | (57.6%) | 0.28      |              |              |                     |
| Income, > 12 K                     | 121                 | (52.4%) | 110      | (47.6%) | 0.02      | (0.38, 0.93) | 0.54         | (0.33, 0.90)        |
| HIV infection                      | 56                  | (40.3%) | 83       | (59.7%) | 0.02      | (1.09, 2.59) | 2.15         | (1.02, 4.53)        |
| Household members < 18 years       | 147                 | (46.8%) | 167      | (53.2%) | 0.22      | (0.79, 3.20) |              |                     |
| Stable Housing                     | 11                  | (68.8%) | 5        | (31.3%) | 0.12      | (0.14, 1.19) |              |                     |
| Drug Use Cocaine, Heroin, Crack    | 27                  | (45.8%) | 32       | (54.2%) | 0.92      | (0.64, 2.02) |              |                     |
| Alcohol, moderate                  | 59                  | (50.4%) | 58       | (49.6%) | 0.80      | (0.51, 1.52) | 0.78         | (0.43, 1.43)        |
| Sex act                            |                     |         |          |         |           |              |              |                     |
|                                    | 44                  | (46.8%) | 50       | (53.2%) |           |              |              |                     |
|                                    | 64                  | (46.4%) | 74       | (53.6%) | 1.04      | (0.62, 1.76) | 1.34         | (0.74, 2.42)        |

\*\*\*Including White Hispanic.

\*\*\*\*Including Black Hispanic.

doi:10.1371/journal.pone.0105957.t002

increasing the risk for obesity [34–35]. Many food insecure households report overeating during times of food availability to compensate for times when food is less available, or they do not have money to buy food [36]. This type of eating, with its related rapid spikes of glucose in the blood and subsequent rapid increases in insulin, may contribute to diet-related disorders such as cardiovascular disease and insulin resistance [37].

Another postulated mediator of obesity among food insecure women is through mental stress. Obesity and psychiatric disorders are thought to have a bi-directional relationship, with a high prevalence of obesity in people with existing mental health disorders, and depression and anxiety contributing to obesity [38]. Multiple studies have shown higher odds of mental stress among food insecure women, including over 3 times higher odds of major depression [39] and higher odds of perceived stress and depressive symptoms [40,41]. Additionally, people with higher stress levels, often measured as blood cortisol levels, have been shown to increase obesogenic eating habits (eating more high-calorie dense food in times of stress) leading to obesity [42]. In qualitative studies across cultures, food insecurity was associated with themes of anxiety, alienation and shame [43–45]. Further studies are needed to understand the relationship between food insecurity, mental health and obesity.

Participation in food assistance programs, such as the Supplemental Nutrition Assistance Program (SNAP) (formerly known as food stamps) helps to alleviate food insecurity [8]. While there are some studies suggest that food assistance programs are a contributing factor to the obesity problem among low income women [46–47], many use historical data and do not control for food insecurity [47].

There have also been many analyses showing the opposite. One analysis showed that the mean BMI was in fact lower among patients receiving higher amounts of SNAP benefits (\$150/month) [4]. This might indicate that if women are only receiving a small amount of food supplementation benefits per month, they are more likely to eat the high calorie dense rich foods that are often cheaper than fresh food, which could lead to obesity [34]. Another study showed that when food insecurity was controlled for, BMI was lower in adults who were enrolled in SNAP >6 months compared to those enrolled for <6 months [48], implying that adequate SNAP benefits may lower the risk of obesity. Additionally, a study in New York City showed that food insecure women not receiving food assistance had higher BMIs as compared to those who were food insecure and receiving food assistance [49]. The Institute of Medicine has recently released a report summarizing the debate in the literature on SNAP benefits and

obesity and coming out in support of food assistance programs to address food insecurity [8].

Our finding that Black women had higher odds of obesity is consistent with national statistics: Black women are 80% more likely to be obese than White women [50]. Food insecurity disproportionately affects Black households, with up to a quarter reporting food insecurity and 10% reporting hunger [1]. Black women are also the subpopulation most affected by HIV/AIDS with Black women accounting for almost 30% of all new infections among Black Americans, 20x the rate of white women [51]. Clearly the health effects of HIV, obesity and food insecurity in Black women needs further investigation.

Interestingly HIV conferred slight protection against obesity in our study, although the prevalence of obesity in HIV infected individuals was quite high at 48%. Other studies have shown that prevalence of obesity in HIV infected individuals is comparable to the general population and more common in African-American women [23], similar to our findings.

This study has several limitations. Due to the cross-sectional design, we could not determine causality. We also did not measure participation in food assistance programs, but as stated above, receiving high levels of SNAP benefits has not been found to be consistently associated with obesity in other studies [4]. This study differs from other studies evaluating food insecurity among HIV-infected populations as this population did not exhibit typical risk factors for food insecurity including drug and alcohol abuse, risky sexual practices, and unstable housing [15], which may limit its generalizability.

Understanding the mechanisms for how food insecurity may contribute to obesity among HIV-infected and uninfected low income women is very important due to the known adverse health effects of obesity. Obesity and its contributions to the pro-inflammatory state of HIV disease may be very important for understanding HIV progression [32]. Food insecurity is an independent marker for increased mortality [52] and the repercussions of being both food insecure and obese need to be further evaluated.

## Acknowledgments

We thank the participants and staff of the Women's Intragency HIV Study.

## Author Contributions

Conceived and designed the experiments: NS KA SDW. Performed the experiments: NS KA. Analyzed the data: NS DRH QS KA. Wrote the paper: NS SDW. Participated in editing and critical revisions of the manuscript: NS DRH KA SDW.

## References

1. Coleman-Jensen A, Nord M, Singh A (2013) Household Food Security in the United States in 2012, ERR-155. U.S. Department of Agriculture, Economic Research Service.
2. Africa Human Development Report 2012 (2012) Towards a Food Secure Future. New York: United Nations Development Programme.
3. Adams EJ, Grummer-Strawn L, Chavez G (2003) Food insecurity is associated with increased risk of obesity in California women. *J Nutr* 133: 1070–1074.
4. Dinour LM, Bergen D, Yeh MC (2007) The food insecurity-obesity paradox: A review of the literature and the role food stamps may play. *Journal of the American Dietetic Association* 107(11): 1952–1961.
5. Ivers L, Cullen KA (2011) Food Insecurity: special considerations for women. *Am J Clin Nutr* 94(suppl): 1740S–1744S.
6. Franklin B, Jones A, Love D, Puckett S, Macklin J, et al. (2012), Exploring Mediators of Food Insecurity and Obesity: a Review of Recent Literature. *J Community Health* 37(1): 253–264.
7. Larson NI, Story MT (2011) Food Insecurity and Weight Status Among U.S. Children and Families. *American Journal of Preventive Medicine* 40(2): 166–173.
8. IOM (Institute of Medicine) (2011) Hunger and Obesity: Understanding a Food Insecurity Paradigm: Workshop Summary. Washington, DC: The National Academies Press.
9. Drewnowski A, Damon N (2005) The economics of obesity: dietary energy density and energy cost. *Am J Clin Nutr* 82(1 Suppl): 265S–273S.
10. National Task Force on the Prevention and Treatment of Obesity (1994) Weight cycling. *JAMA* 272(15): 1196–1202.
11. Hanson KL, Sobal J, Frongillo EA (2007) Gender and marital status clarify associations between food insecurity and body weight. *J Nutr* 137: 1460–1465.
12. Seligman HK, Laraia B, Kushel MB (2010) Food insecurity is associated with chronic disease among low-income NHANES participants. *J Nutr* 140(2): 304–310.
13. Tayie FA, Zizza CA (2009) Food insecurity and dyslipidemia among adults in the United States. *Preventive Medicine* 48(5): 480–485.
14. Gowda C, Hadley C, Aiello AE (2012) The association between food insecurity and inflammation in the US adult population. *Am J Public Health* 102(8): 1579–1586.
15. Weiser SD, Frongillo EA, Ragland K, Hogg RS, Riley ED, et al. (2009) Food insecurity is associated with incomplete HIV RNA suppression among homeless

- and marginally housed HIV-infected individuals in San Francisco. *J Gen Intern Med* 24(1): 14–20.
16. Kalichman S, Cherry C, Amaral C, White D, Kalichman MO, et al. (2010) Health and Treatment Implications of Food Insecurity among People Living with HIV/AIDS. *Journal of Urban Health Bulletin of the New York Academy of Medicine*.
  17. Normen L, Chan K, Braitstein P, Anema A, Bondy G, et al. (2005) Food insecurity and hunger are prevalent among HIV-positive individuals in British Columbia, Canada. *J Nutr* 135: 820–825.
  18. Anema A, Vogenthaler N, Frongillo EA, Kadiyala S, Weiser SD (2009) Food insecurity and HIV/AIDS: current knowledge, gaps, and research priorities. *Curr HIV/AIDS Rep* Nov 6(4): 224–231.
  19. Weiser SD, Young SL, Cohen CR, Kushel MB, Tsai AC, et al. (2011) Conceptual framework for understanding the bidirectional links between food insecurity and HIV/AIDS. *Am J Clin Nutr* 94(6): 1729S–1739S.
  20. Das UN (2001) Is Obesity an Inflammatory Condition? *Nutrition Nov–Dec; 17(11–12): 953–66*.
  21. French AL, Gawel SH, Hershov R, Benning L, Hessel NA, et al. (2009) Trends in mortality and causes of death among women with HIV in the United States: a 10-year study. *J Acquir Immune Defic Syndr* 51(4): 399–406.
  22. Carezzi L, Meraviglia P, Menzaghi B, Valsecchi L, Capetti A, et al. (2012) Incidence and risk factors of major cardiovascular events in a multicentre HIV cohort. *J Int AIDS Soc* 15(Supplement 4): 18272.
  23. Amorosa V, Synnestevedt M, Gross R, Friedman H, MacGregor RR, et al. (2005) A Tale of 2 Epidemics: The Intersection Between Obesity and HIV Infection in Philadelphia. *J AIDS* 39(5): 557–561.
  24. Barkan SE, Melnick SL, Preston-Martin S, Weber K, Kalish LA, et al. (1998) WIHS Collaborative Study Group. The Women's Interagency HIV Study. *Epidemiology* 9: 117–125.
  25. Roberts S (22 Sept 2011) One in Five New York City Residents Living in Poverty. *The New York Times*. Available: [http://www.nytimes.com/2011/09/22/nyregion/one-in-five-new-york-city-residents-living-in-poverty.html?\\_r=0](http://www.nytimes.com/2011/09/22/nyregion/one-in-five-new-york-city-residents-living-in-poverty.html?_r=0). Accessed 2014 Aug 3.
  26. USDA (2011). Characteristics of SNAP Households NewYork Congressional District 16. Available: <http://www.fns.usda.gov/sites/default/files/ops/NewYork.pdf>. Accessed 2014 Aug 2.
  27. Bickel G, Nord M, Price C, Hamilton W, Cook J (2000) *Guide to Measuring Household Food Security*. Alexandria VA: U.S. Department of Agriculture, Food and Nutrition Service.
  28. Weiser SD, Leiter K, Bangsberg DR, Butler LM, Percy-de Korte F, et al. (2007) Food insufficiency is associated with high-risk sexual behavior among women in Botswana and Swaziland. *PLoS Med* 4(10): 1589–1597.
  29. Patterson RE, Frank LL, Kristal AR, White E (2004) A comprehensive examination of health conditions associated with obesity in older adults. *Am J Prev Med* (5): 385–390.
  30. Nguyen T, Lau DC (2012) The obesity epidemic and its impact on hypertension. *Can J Cardiol* 3: 326–333.
  31. Valcour V, Maki P, Bacchetti P, Anastos K, Crystal H, et al. (2012) Insulin resistance and cognition among HIV-infected and HIV-uninfected adult women: the Women's Interagency HIV Study. *AIDS Res Hum Retroviruses* (5): 447–453.
  32. Krishnan S, Schouten JT, Atkinson B, Brown T, Wohl D, et al. (2012) Metabolic syndrome before and after initiation of antiretroviral therapy in treatment-naïve HIV-infected individuals. *J Acquir Immune Defic Syndr* Nov 1; 61(3): 381–9.
  33. Martinez E, Larrousse M, Gatell JM (2009) Cardiovascular disease and HIV infection: host, virus, or drugs? *Curr Opin Infect Dis* 22: 28–34.
  34. Drewnowski A, Specter SE (2004) Poverty and obesity: the role of energy density and energy costs. *Am J Clin Nutr* 79: 6–16.
  35. Tarasuk VS (2001) Household food insecurity with hunger is associated with women's food intakes, health and household circumstances. *J Nutr* 131: 2670–6.
  36. Urbaszat D, Herman CP, Polivy J (2002) Eat, drink, and be merry, for tomorrow we diet: effects of anticipated deprivation on food intake in restrained and unrestrained eaters. *J Abnorm Psychology* 111: 396–401.
  37. Duska F, Andel M, Kubena A, Macdonald IA (2005) Effects of acute starvation on insulin resistance in obese patients with and without type 2 diabetes mellitus. *Clin Nutr* 24: 1056–64.
  38. Lopresti AL, Drummond PD (2013) Obesity and psychiatric disorders: Commonalities in dysregulated biological pathways and their implications for treatment. *Prog Neuropsychopharmacol Biol Psychiatry* Aug; 45: 92–9.
  39. Vozoris NT, Tarasuk VS (2003) Household food insufficiency is associated with poorer health. *J Nutr* 133: 120–6.
  40. Garcia J, Hromi-Fiedler A, Mazur RE, Marquis G, Sellen D, et al. (2013) Persistent household food insecurity, HIV, and maternal stress in peri-urban Ghana. *BMC Public Health* Mar 11; 13: 215.
  41. Laraia BA, Borja JB, Bentley ME (2009) Grandmothers, fathers, and depressive symptoms are associated with food insecurity among low-income first-time African-American mothers in North Carolina. *J Am Diet Assoc* Jun; 109(6): 1042–7.
  42. Lee TK, Clarke JJ, St John J, Young IR, Leury BL, et al. (2014) High cortisol responses identify propensity for obesity that is linked to thermogenesis in skeletal muscle. *FASEB J* Jan; 28(1): 35–44.
  43. Piaseu N, Belza B, Shell-Duncan B (2004) Less money less food: voices from women in urban poor families in Thailand. *Health Care Women Int* 25: 604–19.
  44. Hamelin AM, Habicht JP, Beaudry M (1999) Food insecurity: Consequences for the household and broader social implications. *J Nutr* 129: 525S–8S.
  45. Coates J, Frongillo EA, Rogers BL, Webb P, Wilde PE, et al. (2006) Commonalities in the experience of household food insecurity across cultures: what are measures missing? *J Nutr* 136: 1438S–48S.
  46. Leung CL, Willett WC, Ding EL (2012) Low-income Supplemental Nutrition Assistance Program participation is related to adiposity and metabolic risk factors. *Am J Clin Nutr*: 95(1): 17–24.
  47. Gibson D (2003) Food stamp program participation is positively related to obesity in low income women. *J Nutr* 133(7): 2225–31.
  48. Webb AL, Schiff A, Currihan D, Villamor E (2008) Food Stamp Program participation but not food insecurity is associated with higher adult BMI in Massachusetts residents living in low income neighbourhoods. *Public Health Nutrition* 11(12): 1248–1255.
  49. Karnik A, Foster BA, Mayer V, Pratomo V, McKee D, et al. (2011) Food insecurity and obesity in New York City primary care clinics. *Medical Care* 49(7): 658–661.
  50. National Center for Health Statistics (2013) *Health, United States, 2012: With Special Feature on Emergency Care*. Hyattsville, MD.
  51. Centers for Disease Control and Prevention (2012) *Estimated HIV incidence in the United States, 2007–2010. HIV Surveillance Supplemental Report 17(4)*. Available: <http://www.cdc.gov/hiv/topics/surveillance/resources/reports/#supplemental>. Accessed 2014 Aug 1.
  52. Weiser SD, Fernandes KA, Brandson EK, Lima VD, Anema A, et al. (2009) The association between food insecurity and mortality among HIV-infected individuals on HAART. *J Acquir Immune Defic Syndr* 52(3): 342–349.
